# Supplementary material for: Mitochondrial PCK2 Missense Variant in Shetland Sheepdogs with Paroxysmal Exercise-Induced Dyskinesia (PED)
Source: MDPI journal article supplement (doi:10.3390/genes11070774), 2020-07-09
Supplement: s1 [file s1]

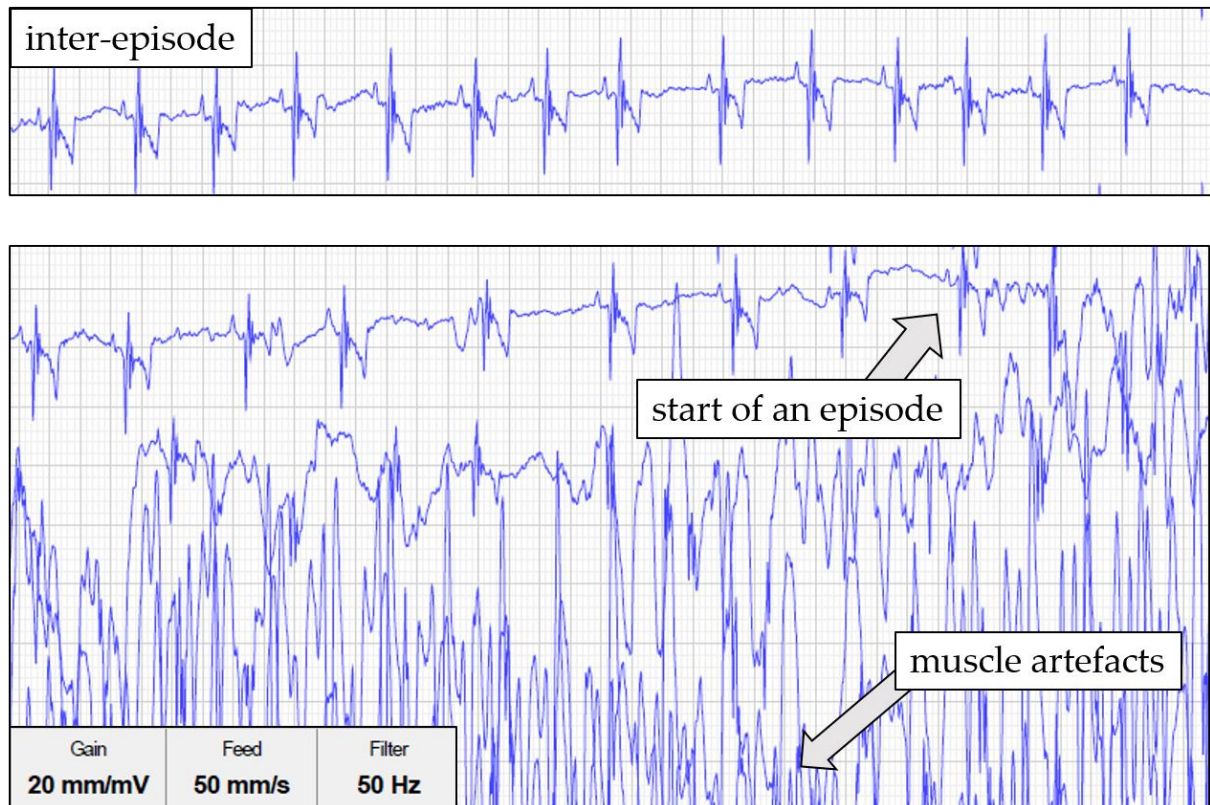

**Figure S1.** Long-term electrocardiography (ECG) of case 4 before a dyskinetic episode and at the beginning of an episode. ECG between and before an episode reveals normal sinus rhythm with mild tachycardia (120-180 bpm). When a dyskinetic episode starts, ECG is overlapped by muscle artefacts. ECG did not reveal cardiac pathology.
